# Supplementary material for: Nitrogen-doped carbon nanotubes derived from Zn–Fe-ZIF nanospheres and their application as efficient oxygen reduction electrocatalysts with in situ generated iron species
Source: Royal Society of Chemistry journal article supplement (doi:10.1039/c3sc51052b), 2013-01-01
Supplement: c3sc51052b.pdf [file c3sc51052b.pdf]

## Supporting Information

### NCNTs Derived from Zn-Fe-ZIF Nanospheres and Their Application as Efficient Oxygen Reduction Electrocatalysts with in-situ Generated Iron Species

Panpan Su<sup>‡ab</sup>, Hui Xiao<sup>‡bc</sup>, Jiao Zhao<sup>a</sup>, Yi Yao<sup>ab</sup>, Zhigang Shao<sup>c</sup>, Can Li<sup>\*a</sup> and

Qihua Yang<sup>\*a</sup>

<sup>a</sup> State Key Laboratory of Catalysis, Dalian Institute of Chemical Physics, Chinese Academy of Sciences, 457 Zhongshan Road, Dalian 116023 (China).

<sup>b</sup> Graduate School of the Chinese Academy of Sciences, Beijing 100039 (China).

<sup>c</sup> Dalian National Laboratory for Clean Energy, Dalian Institute of Chemical Physics, Chinese Academy of Sciences, 457 Zhongshan Road, Dalian 116023 (China).

\* To whom correspondence should be addressed.

Email Address: [yangqh@dicp.ac.cn](mailto:yangqh@dicp.ac.cn); [canli@dicp.ac.cn](mailto:canli@dicp.ac.cn).

Tel: 86-411-84379552; 86-411-84379070.

Fax Number: 86-411-84694447.

URL: <http://www.hmm.dicp.ac.cn>; <http://www.canli.dicp.ac.cn>.

‡ Panpan Su and Hui Xiao contributed equally to this work.

## Experimental section

### Preparation of Zn-Fe-ZIFs

In a typical experiment,  $\text{Zn}(\text{NO}_3)_2 \cdot 6\text{H}_2\text{O}$  (1.1175 mmol) and  $\text{FeSO}_4 \cdot 7\text{H}_2\text{O}$  (0.2235 mmol) were dissolved in 15 mL DMF solvent and then mixed with DMF solution of 2-methylimidazole (15 mL, 0.08 M) under stirring. The resulting mixture was stirred for another 30 min at room temperature and then transformed into Teflon-lined stainless steel sealed vessel (40 mL) and heated at 140 °C for 48 h. After cooling down to room temperature, the basal precipitate was isolated by centrifugation and washed thoroughly with DMF. The product was denoted as Zn-Fe-ZIFs. The Zn-Fe-ZIFs was dispersed in DMF solution containing proper quantity DCDA (0.125g / mL), and then the DMF solvent was removed at 70 °C in a low pressure system. The products were denoted as Zn-Fe-ZIFs-x DCDA, where x refers to the mass ratio of DCDA to Zn-Fe-ZIFs.

### Synthesis of nitrogen doped carbon nanotubes

The calcination procedures of Zn-Fe-ZIFs were conducted in a flow of ultrapure  $\text{N}_2$ , and kept for 4 hours under 900 °C with the heating rate of 5 °C/min. The pyrolyzed samples were treated with acid ( $\text{HCl}$  (12 M):  $\text{HNO}_3$  (14.5 M) =3:1 volume ratio) for 6 h and then refluxed in  $\text{HNO}_3$  solution (14.5 M) for 2 h at 120 °C. Subsequently, the products were washed with deionized water thoroughly and then dried at 100 °C for 24 h.

The synthesis procedures for NCNTs-x were similar to NCNTs. Zn-Fe-ZIFs-x DCDA were calcinated in a flow of ultrapure  $\text{N}_2$ , and keep for 3 hours under 700 °C

with the heating rate of 5 °C/min. In order to remove a part of metal species formed during carbonization process, 0.2 g product was dispersed in 40 mL aqua regia (HCl (12 M): HNO<sub>3</sub> (14.5 M) =3:1 volume ratio) and stirred at room temperature for 20 min. The other procedures were similar to those for NCNTs and the products were denoted as NCNTs-x, where x refers to the mass ratio of DCDA to Zn-Fe-ZIFs.

### Characterization

The scanning electron microscopy (SEM) was performed on JEOL JSM-6360 scanning electron microscope operating at an acceleration voltage of 20 kV. The transmission electron microscopy (TEM) was undertaken using an FEI Tecnai G<sup>2</sup> Spirit at an acceleration voltage of 120 kV. The samples were placed onto an ultrathin carbon film supported on a copper grid. The powder X-ray diffraction data were collected on a Rigaku D/Max2500PC diffractometer with Cu K $\alpha$  radiation ( $\lambda$ =1.5418 Å) over the 2 $\theta$  range of 3°-85° with a scan speed of 5 °/min at room temperature. High resolution transmission electron microscopy (HRTEM) images were recorded on a FEI Tecnai F30 microscope with a point resolution of 0.20 nm operated at 300 kV. The nitrogen sorption experiments were performed at 77 K on a Micromeritics ASAP 2020 system. Prior to the measurement, the samples were degassed at 140 °C for 6 h. Elemental analyses were determined on a Vario ELIII Elemental analyzer. The metal content was determined by PLASAM-SPEC-II inductively coupled plasma atomic emission spectrometry (ICP). Visible Raman spectra were recorded at room temperature on a Jobin Yvon LabRAM HR 800 instrument with a 532 nm excitation laser at a power of around 1 mW.

## Electrochemical measurements

Electrochemical measurements were performed using a CHI Electrochemical Station (Model 730D) in a three-electrode electrochemical cell at room temperature. Platinum foil and a saturated calomel electrode (SCE) were used as the counter and reference electrode, respectively. The catalyst layer on the glassy carbon electrode ( $0.1256\text{ cm}^2$ ) was prepared as follows. A mixture with 5 mg NCNTs-x catalyst, 1 mL isopropanol and 50  $\mu\text{L}$  Nafion (5 wt %, Du Pont Corp.) was prepared using sonication. A 30  $\mu\text{L}$  ink was dropped onto the glassy carbon disk, which was then left to dry in air at room temperature, to yield a catalyst loading of ca.  $570\text{ }\mu\text{g cm}^{-2}$ . For comparison, the loading of commercial Pt/C (20 wt %, Johnson Matthey) catalyst was controlled at  $10\text{ }\mu\text{gPt cm}^{-2}$ .

Cyclic voltammetry (CV) experiments were carried out in  $\text{O}_2$  or  $\text{N}_2$  saturated 0.1 M KOH solution. The potential was varied from -1.0 V to 0.2 V at a scan sweep of 100 mV/s. In the rotating disk electrode (RDE) tests, the linear sweep voltammograms (LSVs) were recorded in  $\text{O}_2$  saturated 0.1 M KOH solution and the electrode potential was scanned between -1.0 V and 0.2 V with a scan rate of 10 mV/s at various rotating speeds from 100 to 2500 rpm. The oxygen reduction current was corrected by the background current.

In rotating ring disk electrode (RRDE) tests, the ring potential was set to 0.456 V vs. SCE to oxidize the hydrogen peroxide produced during oxygen reduction on the disk electrode. The transferred electron-transfer number ( $n$ ) and the hydrogen peroxide yield (%  $\text{H}_2\text{O}_2$ ) in the ORR was calculated as follows,

$$\%H_2O_2 = \frac{2I_r}{N|I_d| + I_r} \times 100\%$$

$$n = 4 - 2 \times \frac{\%H_2O_2}{100}$$

Where  $I_d$  and  $I_r$  is the disk and ring current, respectively, and  $N$  is the RRDE collection efficiency, which was determined to be 0.37 herein.

The Koutecky-Levich plots were obtained by linear fitting of the reciprocal rotating speed versus reciprocal current density collected at different potentials from -0.2 V to -0.5 V. The electron transfer numbers were calculated from the slopes of Koutecky-Levich plots using the following equation:

$$-\frac{1}{j} = -\frac{1}{j_k} + \frac{1}{0.62nFD_{O_2}^{2/3}C_{O_2}\nu^{-1/6}\omega^{1/2}}$$

where  $j$  is the measured current density,  $j_k$  is the kinetic current density,  $F$  is the Faradaic constant ( $96,485 \text{ C mol}^{-1}$ ),  $D_{O_2}$  is the  $O_2$  diffusion coefficient  $0.1 \text{ M KOH}$  ( $1.9 \times 10^{-5} \text{ cm}^2 \text{ s}^{-1}$ ),  $C_{O_2}$  is the  $O_2$  saturation concentration in  $0.1 \text{ M KOH}$  ( $1.2 \times 10^{-3} \text{ mol L}^{-1}$ ),  $\nu$  is the kinematic viscosity in  $0.1 \text{ M KOH}$  ( $0.1 \text{ m}^2 \text{ s}^{-1}$ ) and  $\omega$  is the rotation rate.

Table S1 The textual parameters and metal content of NCNTs-x purified with aqua regia.

| Samples           | BET surface              | Fe content | Zn content | Intensity ratio of |
|-------------------|--------------------------|------------|------------|--------------------|
|                   | area (m <sup>2</sup> /g) | (%)        | (%)        | G and D bands      |
| NCNTs-2.5         | 124                      | 12.52      | 2.88       | 0.4                |
| NCNTs-5           | 152                      | 10.38      | 2.76       | 0.35               |
| NCNTs-10          | 139                      | 9.62       | 4.34       | 0.45               |
| NCNTs-20          | 151                      | 12.93      | 3.80       | 0.34               |
| NCNTs-20-acid-24h | —                        | 5.23       | 0.62       | —                  |

Table S2 The N content and N dopant state of NCNTs-20-900 and NCNTs-20-acid-24h.

| Samples           | N content<br>(wt %) | the relative content of different N species to total N |            |             |
|-------------------|---------------------|--------------------------------------------------------|------------|-------------|
|                   |                     | graphitic N                                            | pyrrolic N | pyridinic N |
| NCNTs-20-900      | 0.86                | 0.43                                                   | 0.29       | 0.28        |
| NCNTs-20-acid-24h | 10.65               | 0.42                                                   | 0.56       | 0.02        |

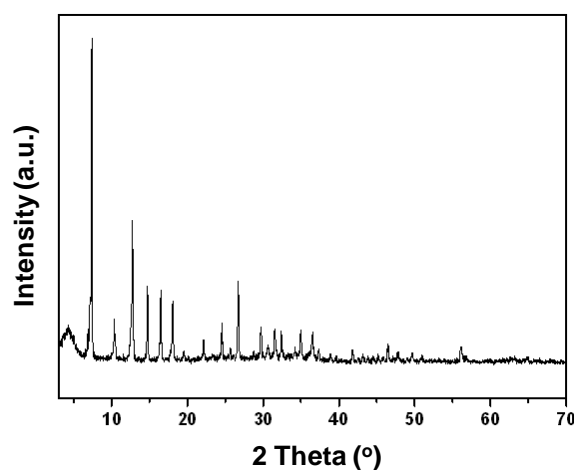

Fig. S1 The XRD pattern of Zn-Fe-ZIFs.

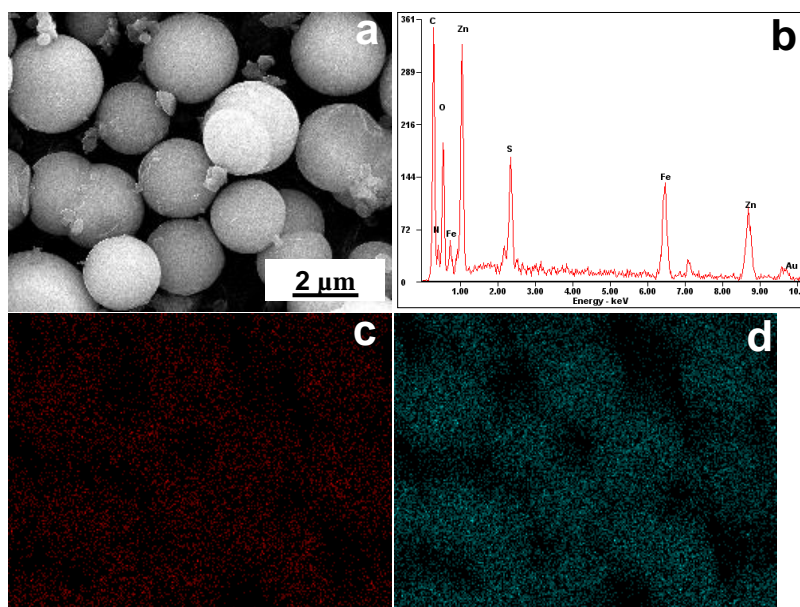

Fig. S2 The SEM image (a), EDX result (b) of Zn-Fe-ZIFs and EDX mapping result of Zn (c) and Fe (d) in Zn-Fe-ZIFs spheres.

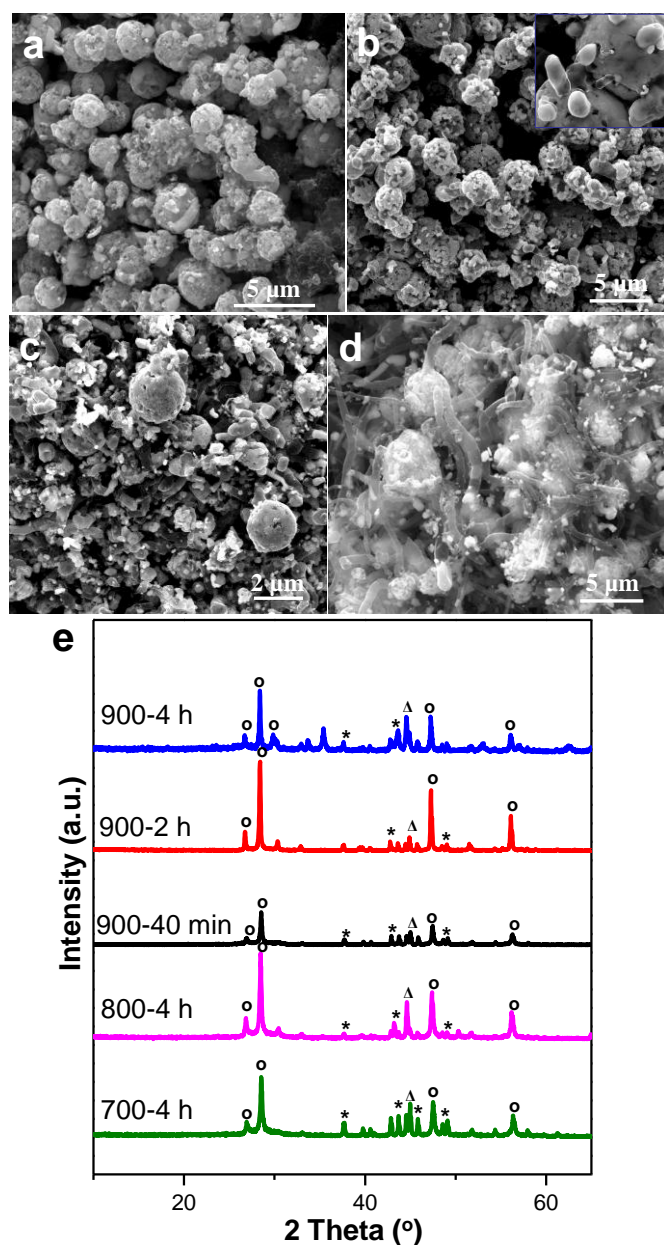

Fig. S3 SEM images (a-d) and XRD patterns (e) of Zn-Fe-ZIFs pyrolyzed under different conditions. SEM images of Zn-Fe-ZIFs pyrolyzed at 900 °C (a) 40 min, (b) 2 h, (c) 3 h and (d) 4 h; in the XRD patterns, different sign refers to different phase (\* Fe<sub>3</sub>C, Δ Fe, o ZnS). For all the carbonized samples, the diffraction peaks of ZnS were observed, probably due to the existence of SO<sub>4</sub><sup>2-</sup> attached to the samples. During the carbonization step, the SO<sub>4</sub><sup>2-</sup> may be reduced and then reacted with Zn<sup>2+</sup> leading to the formation of ZnS.



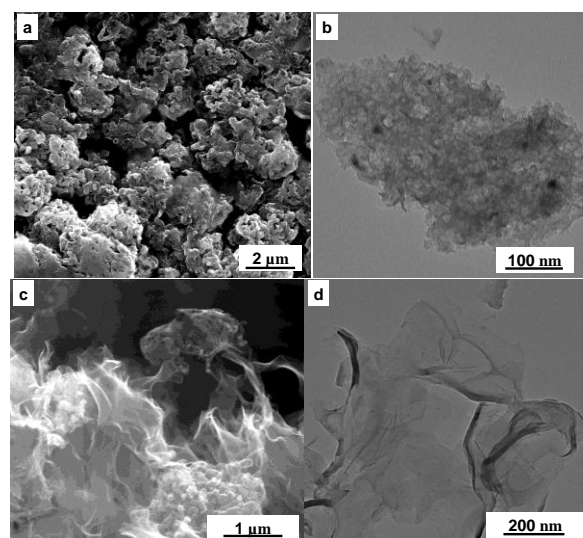

Fig. S4 SEM (a, c) and TEM (b, d) images of the samples (purified with aqua regia and  $\text{HNO}_3$ ) obtained by pyrolysis of Zn-Fe-ZIFs at (a, b) 700 °C and (c, d) 800 °C.

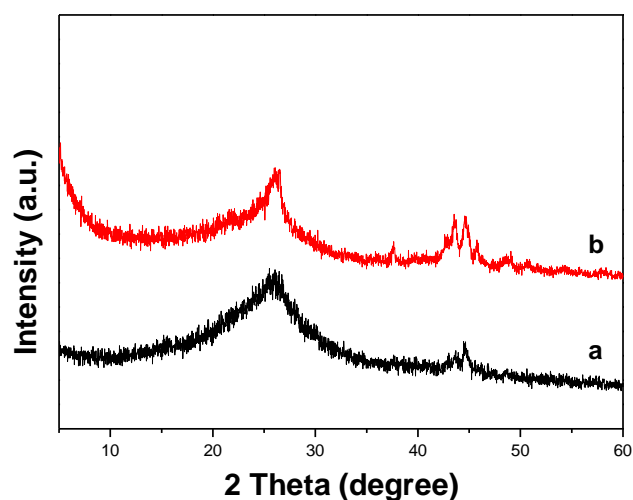

Fig. S5 The XRD patterns of carbon materials (purified with aqua regia and  $\text{HNO}_3$ ) obtained at pyrolyzed temperatures of (a) 700 °C and (b) 800 °C.

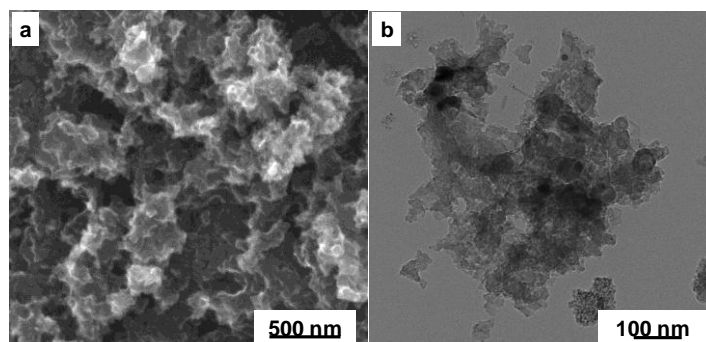

Fig. S6 SEM (a) and TEM (b) images of the samples (purified with aqua regia) obtained by pyrolysis of ZIF-8 impregnated with  $\text{FeSO}_4$  at 900 °C.

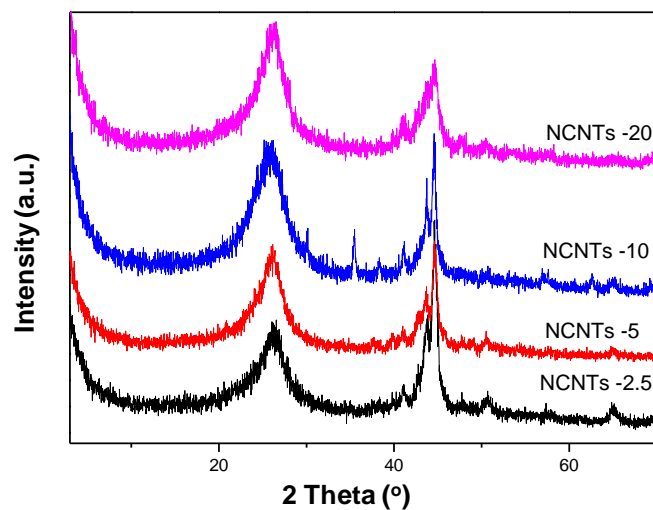

Fig. S7 The XRD patterns of NCNTs-x ( $x=2.5, 5, 10, 20$ ) purified with aqua regia.

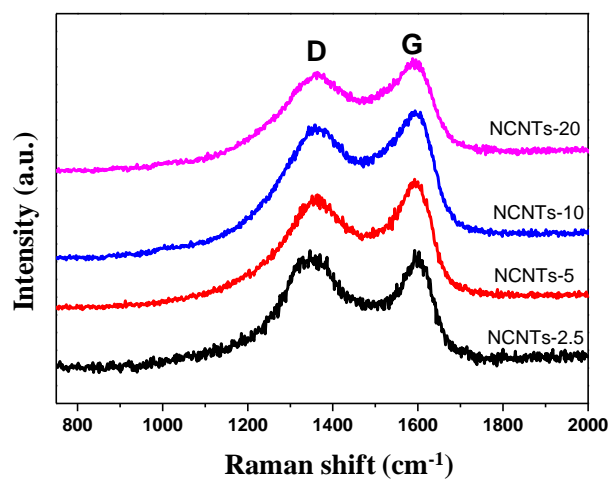

Fig. S8 The Raman spectra of NCNTs-x ( $x=2.5, 5, 10, 20$ ) purified with aqua regia.

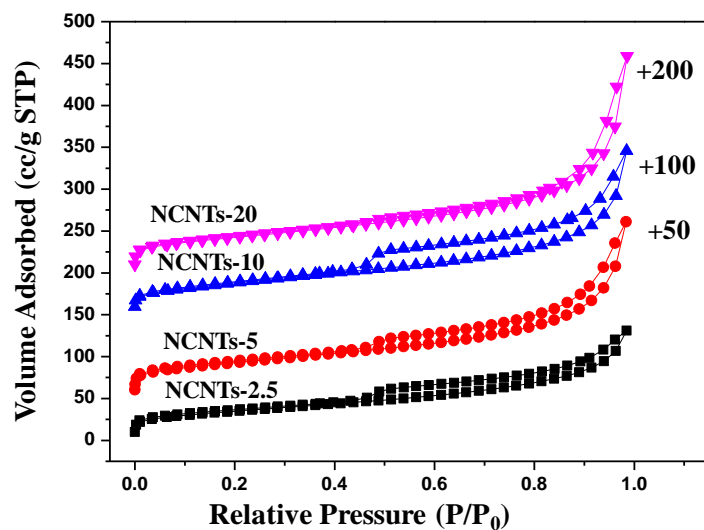

Fig. S9 The nitrogen adsorption-desorption isotherms of NCNTs-x purified with aqua regia.

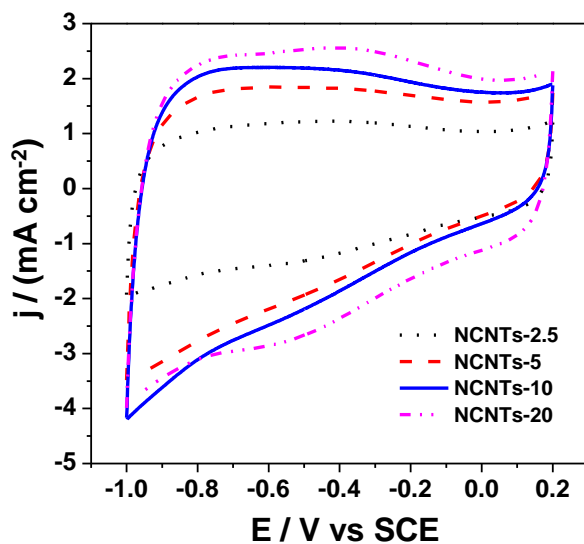

Fig. S10 CV curves for NCNTs-x (purified with aqua regia) and Pt/C (20 wt %, Johnson Matthey) at a scan rate of 100 mV s<sup>-1</sup> in N<sub>2</sub> saturated 0.1 M KOH solution.

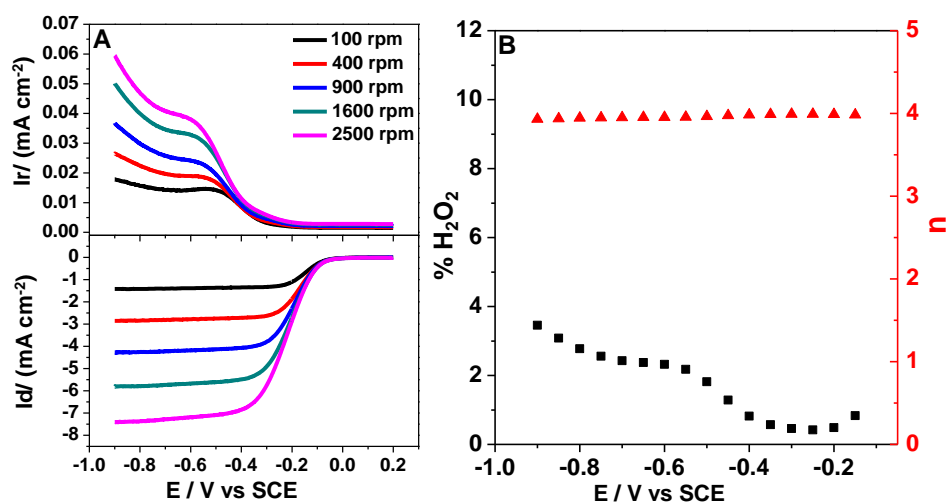

Fig. S11(A) Rotating ring disk electrode measurements for oxygen reduction on purified NCNTs-10 in  $O_2$  saturated 0.1 M KOH with different rotation rates at a scan rate of 10 mV/s and (B) potential- $\%H_2O_2$  curve and potential- $n$  curve for NCNTs-10 catalyst at the rotation rate of 1600 rpm.

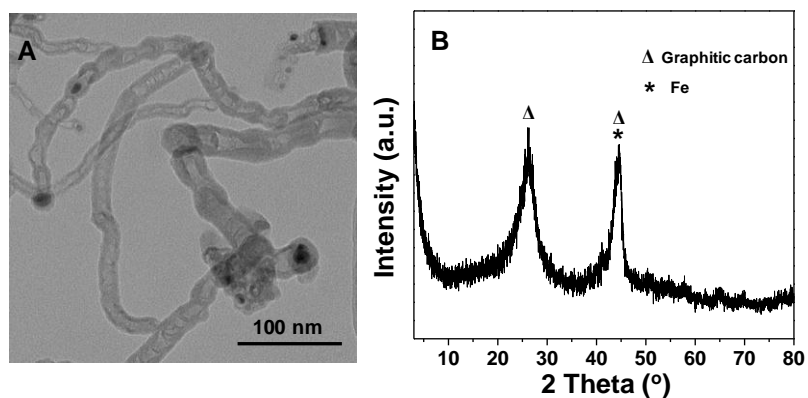

Fig. S12 TEM image (A) and XRD pattern (B) of NCNTs-20-acid-24h.

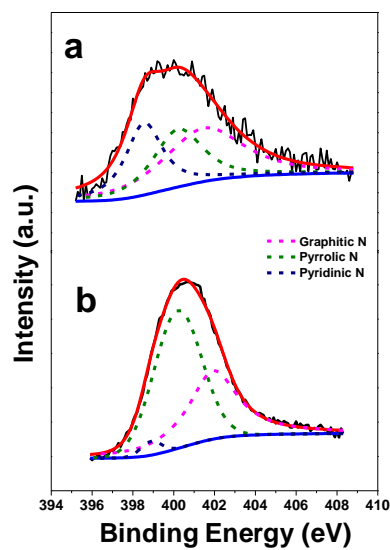

Fig. S13 The N1s XPS spectra of (a) NCNTs-20-900 and (b) NCNTs-20-acid-24h.

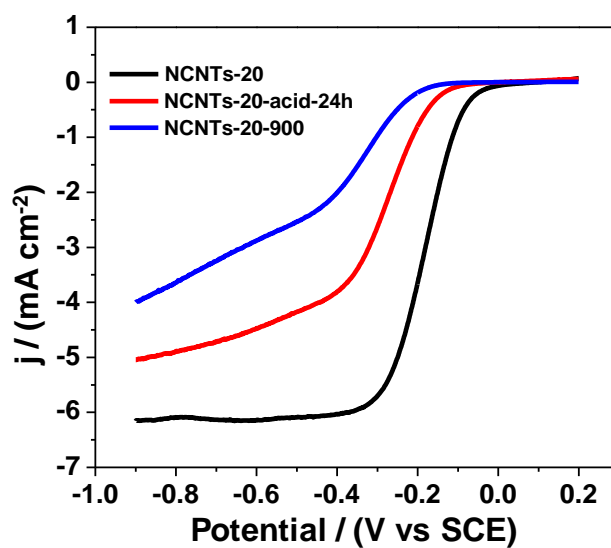

Fig. S14 LSV curves for NCNTs-20, NCNTs-20-acid-24h and NCNTs-20-900 in O<sub>2</sub> saturated 0.1 M KOH at the rotation rate of 1600 rpm.
